# Supplementary material for: Cortical Deficits of Glutamic Acid Decarboxylase 67 Expression in Schizophrenia: Clinical, Protein, and Cell Type-Specific Features
Source: Atypon-hosted journal article supplement (doi:10.1176/appi.ajp.2011.11010052), 2011-06-03
Supplement: ajp_168_09_921_02.pdf [file ajp_168_09_921_02.pdf]

**FIGURE S1. GAD67 (1:800) and Tubulin (1:20,000) Optical Density (OD) Increase in a Linear and Proportional Fashion as Protein Load Increases Between 20 and 40  $\mu\text{g}$ <sup>a</sup>**

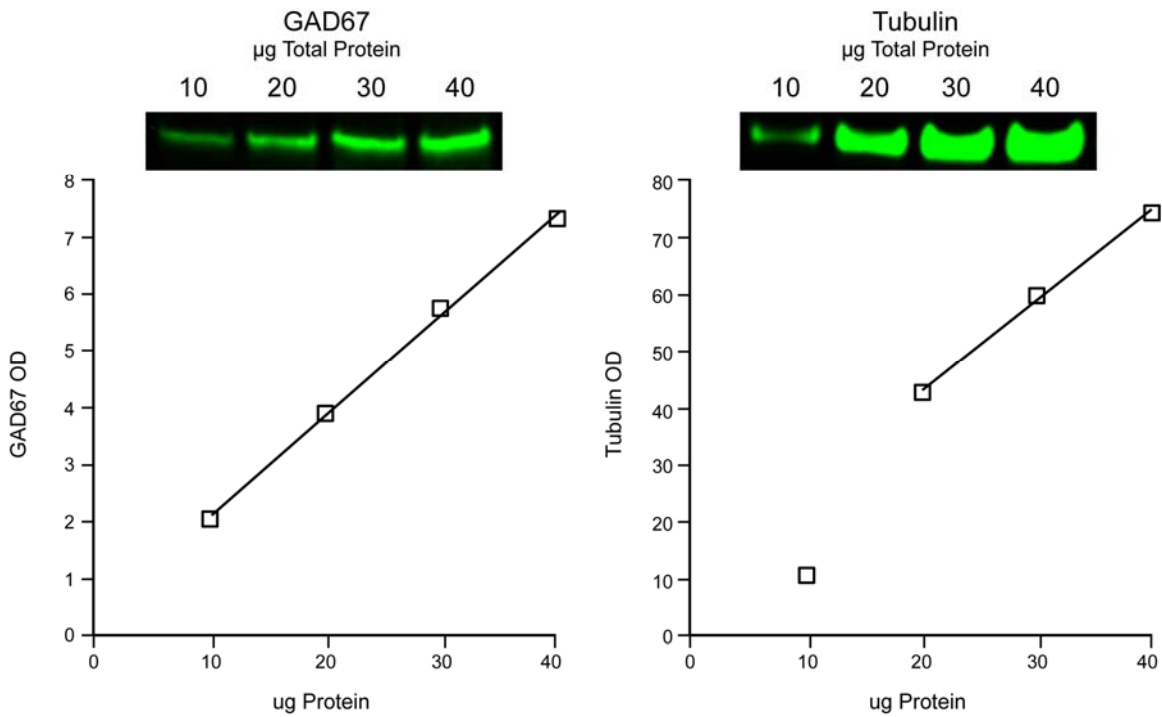

<sup>a</sup> The gel images and plots show an increase in GAD67 (left) and tubulin (right) OD with increasing protein load. OD and  $\mu\text{g}$  protein are significantly correlated from 10–40  $\mu\text{g}$  ( $r=0.99$ ,  $p=0.001$ ) and 20–40  $\mu\text{g}$  ( $r=0.99$ ,  $p=0.026$ ) for GAD67 and tubulin, respectively.
