# Supplementary material for: Cortical Deficits of Glutamic Acid Decarboxylase 67 Expression in Schizophrenia: Clinical, Protein, and Cell Type-Specific Features
Source: Atypon-hosted journal article supplement (doi:10.1176/appi.ajp.2011.11010052), 2011-06-03
Supplement: ajp_168_09_921_03.pdf [file ajp_168_09_921_03.pdf]

**FIGURE S2. Illustration of Lipofuscin Autofluorescence<sup>a</sup>**

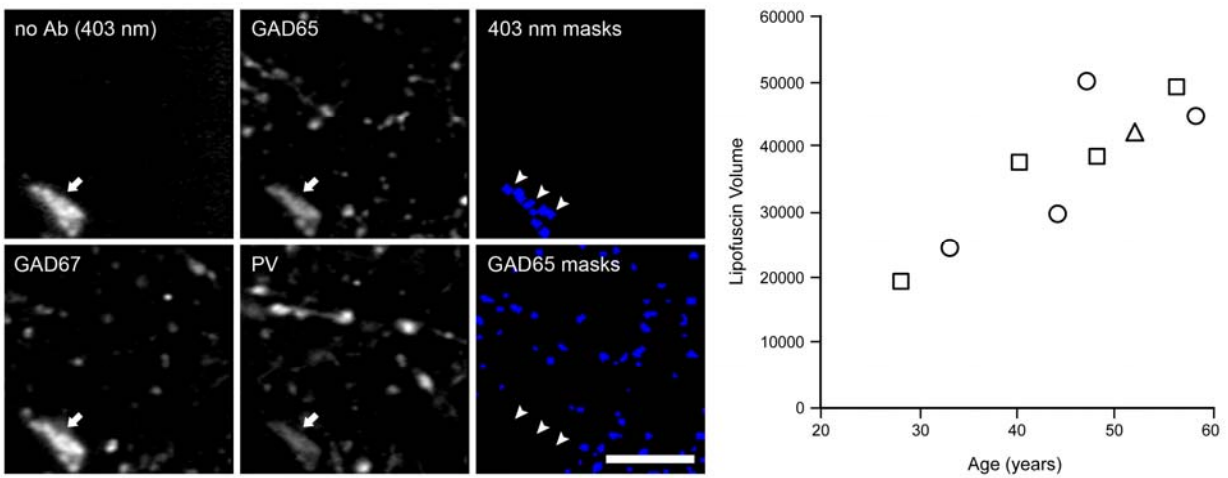

<sup>a</sup> The arrow in the single z-plane images on the left side shows lipofuscin autofluorescence in the 403 (top left), GAD65 (top middle), GAD67 (bottom left), and parvalbumin (PV) (bottom middle) channels. To exclude lipofuscin signal, any GAD65 mask objects that overlapped with 403 nm mask objects (arrowheads; top right) were removed from final analyses (bottom right). Scale bar=10  $\mu$ m. The plot on the right shows the age of comparison (square), schizophrenia (circle), and schizoffective (triangle) subjects against the total lipofuscin volume per subject. Subject age is significantly correlated with total lipofuscin volume ( $r=0.87$ ,  $p=0.002$ ). One outlier subject was excluded.
