# Supplementary material for: Cortical Deficits of Glutamic Acid Decarboxylase 67 Expression in Schizophrenia: Clinical, Protein, and Cell Type-Specific Features
Source: Atypon-hosted journal article supplement (doi:10.1176/appi.ajp.2011.11010052), 2011-06-03
Supplement: ajp_168_09_921_04.pdf [file ajp_168_09_921_04.pdf]

|    | A                                                                                                                                                                                                                                | B           | C                    | D          | E                      | F                                   | G          | H         | I                           | J           | K                                           | L                    | M          | N                      | O                                   |
|----|----------------------------------------------------------------------------------------------------------------------------------------------------------------------------------------------------------------------------------|-------------|----------------------|------------|------------------------|-------------------------------------|------------|-----------|-----------------------------|-------------|---------------------------------------------|----------------------|------------|------------------------|-------------------------------------|
| 1  | Supplemental table for Curley et al., Cortical Deficits of Glutamic Acid Decarboxylase 67 Expression in Schizophrenia: Clinical, Protein, and Cell Type-Specific Features, Am J Psychiatry (doi: 10.1176/appi.ajp.2011.11010052) |             |                      |            |                        |                                     |            |           |                             |             |                                             |                      |            |                        |                                     |
| 2  |                                                                                                                                                                                                                                  |             |                      |            |                        |                                     |            |           |                             |             |                                             |                      |            |                        |                                     |
| 3  | <b>TABLE S1. Characteristics of Human Subjects Used in this Study</b>                                                                                                                                                            |             |                      |            |                        |                                     |            |           |                             |             |                                             |                      |            |                        |                                     |
| 4  |                                                                                                                                                                                                                                  |             |                      |            |                        |                                     |            |           |                             |             |                                             |                      |            |                        |                                     |
| 5  | <b>Comparison Subjects</b>                                                                                                                                                                                                       |             |                      |            |                        |                                     |            |           |                             |             | <b>Subjects with Schizophrenia</b>          |                      |            |                        |                                     |
| 6  | <b>Pair</b>                                                                                                                                                                                                                      | <b>Case</b> | <b>Sex/<br/>Race</b> | <b>Age</b> | <b>PMI<sup>d</sup></b> | <b>Storage<br/>Time<sup>e</sup></b> | <b>RIN</b> | <b>pH</b> | <b>Cause of Death</b>       | <b>Case</b> | <b>DSM IV diagnosis</b>                     | <b>Sex/<br/>Race</b> | <b>Age</b> | <b>PMI<sup>d</sup></b> | <b>Storage<br/>Time<sup>e</sup></b> |
| 7  | 1                                                                                                                                                                                                                                | 592         | M/B                  | 41         | 22.1                   | 159                                 | 9.0        | 6.7       | ASCVD                       | 533         | Chronic undifferentiated schizophrenia      | M/W                  | 40         | 29.1                   | 169                                 |
| 8  | 2 <sup>a</sup>                                                                                                                                                                                                                   | 567         | F/W                  | 46         | 15.0                   | 163                                 | 8.9        | 6.7       | Mitral Valve prolapse       | 537         | Schizoaffective disorder                    | F/W                  | 37         | 14.5                   | 168                                 |
| 9  | 3 <sup>a</sup>                                                                                                                                                                                                                   | 516         | M/B                  | 20         | 14.0                   | 171                                 | 8.4        | 6.9       | Homicide by gun shot        | 547         | Schizoaffective disorder                    | M/B                  | 27         | 16.5                   | 167                                 |
| 10 | 4 <sup>c</sup>                                                                                                                                                                                                                   | 630         | M/W                  | 65         | 21.2                   | 153                                 | 9.0        | 7.0       | ASCVD                       | 566         | Chronic undifferentiated schizophrenia; AAR | M/W                  | 63         | 18.3                   | 164                                 |
| 11 | 4 <sup>a,c</sup>                                                                                                                                                                                                                 | 1322        | M/W                  | 62         | 16.5                   | 37                                  | 8.6        | 6.8       | ASCVD                       | ---         |                                             |                      |            |                        |                                     |
| 12 | 5                                                                                                                                                                                                                                | 604         | M/W                  | 39         | 19.3                   | 157                                 | 8.6        | 7.1       | Hypoplastic coronary artery | 581         | Chronic paranoid schizophrenia; ADC; OAC    | M/W                  | 46         | 28.1                   | 161                                 |
| 13 | 6                                                                                                                                                                                                                                | 546         | F/W                  | 37         | 23.5                   | 167                                 | 8.6        | 6.7       | ASCVD                       | 587         | Chronic undifferentiated schizophrenia; AAR | F/B                  | 38         | 17.8                   | 160                                 |
| 14 | 7                                                                                                                                                                                                                                | 551         | M/W                  | 61         | 16.4                   | 166                                 | 8.3        | 6.6       | Cardiac Tamponade           | 625         | Chronic disorganized schizophrenia; AAC     | M/B                  | 49         | 23.5                   | 154                                 |
| 15 | 8 <sup>a,b</sup>                                                                                                                                                                                                                 | 685         | M/W                  | 56         | 14.5                   | 146                                 | 8.1        | 6.6       | Hypoplastic coronary artery | 622         | Chronic undifferentiated schizophrenia      | M/W                  | 58         | 18.9                   | 154                                 |
| 16 | 9 <sup>a</sup>                                                                                                                                                                                                                   | 681         | M/W                  | 51         | 11.6                   | 147                                 | 8.9        | 7.2       | Hypertrophic cardiomyopathy | 640         | Chronic paranoid schizophrenia              | M/W                  | 49         | 5.2                    | 152                                 |
| 17 | 10                                                                                                                                                                                                                               | 806         | M/W                  | 57         | 24.0                   | 125                                 | 7.8        | 6.9       | Pulmonary embolism          | 665         | Chronic paranoid schizophrenia; ADC         | M/B                  | 59         | 28.1                   | 149                                 |
| 18 | 11                                                                                                                                                                                                                               | 822         | M/B                  | 28         | 25.3                   | 123                                 | 8.5        | 7.0       | ASCVD                       | 787         | Schizoaffective disorder; ODC               | M/B                  | 27         | 19.2                   | 129                                 |

|    | A                 | B   | C   | D  | E    | F   | G   | H   | I                        | J   | K                                                   | L   | M  | N    | O   |
|----|-------------------|-----|-----|----|------|-----|-----|-----|--------------------------|-----|-----------------------------------------------------|-----|----|------|-----|
| 19 | 12 <sup>a</sup>   | 727 | M/B | 19 | 7.0  | 140 | 9.2 | 7.2 | Trauma                   | 829 | Schizoaffective disorder;<br>ADC; OAR               | M/W | 25 | 5.0  | 121 |
| 20 | 13 <sup>a,b</sup> | 871 | M/W | 28 | 16.5 | 112 | 8.5 | 7.1 | Trauma                   | 878 | Disorganized<br>schizophrenia; ADC                  | M/W | 33 | 10.8 | 111 |
| 21 | 14 <sup>a</sup>   | 575 | F/B | 55 | 11.3 | 162 | 9.6 | 6.8 | ASCVD                    | 517 | Disorganized<br>schizophrenia; ADC                  | F/W | 48 | 3.7  | 170 |
| 22 | 15                | 700 | M/W | 42 | 26.1 | 144 | 8.7 | 7.0 | ASCVD                    | 539 | Schizoaffective disorder;<br>ADR                    | M/W | 50 | 40.5 | 168 |
| 23 | 16                | 988 | M/W | 82 | 22.5 | 91  | 8.4 | 6.2 | Trauma                   | 621 | Chronic undifferentiated<br>schizophrenia           | M/W | 83 | 16.0 | 154 |
| 24 | 17                | 686 | F/W | 52 | 22.6 | 146 | 8.5 | 7.0 | ASCVD                    | 656 | Schizoaffective disorder;<br>ADC                    | F/B | 47 | 20.1 | 150 |
| 25 | 18                | 634 | M/W | 52 | 16.2 | 153 | 8.5 | 7.0 | ASCVD                    | 722 | Chronic undifferentiated<br>schizophrenia; ODR; OAR | M/B | 45 | 9.1  | 140 |
| 26 | 19 <sup>a,b</sup> | 852 | M/W | 54 | 8.0  | 115 | 9.1 | 6.8 | Cardiac tamponade        | 781 | Schizoaffective disorder;<br>ADR                    | M/B | 52 | 8.0  | 130 |
| 27 | 20                | 987 | F/W | 65 | 21.5 | 91  | 9.1 | 6.8 | ASCVD                    | 802 | Schizoaffective disorder;<br>ADC; ODR               | F/W | 63 | 29.0 | 126 |
| 28 | 21                | 818 | F/W | 67 | 24.0 | 124 | 8.4 | 7.1 | Anaphylactic<br>reaction | 917 | Chronic undifferentiated<br>schizophrenia           | F/W | 71 | 23.8 | 104 |
| 29 | 22 <sup>a,b</sup> | 857 | M/W | 48 | 16.6 | 114 | 8.9 | 6.7 | ASCVD                    | 930 | Disorganized<br>schizophrenia; ADR; OAR             | M/W | 47 | 15.3 | 100 |

|    | A                          | B           | C                    | D          | E                      | F                                   | G          | H         | I                     | J                                  | K                                        | L                    | M          | N                      | O                                   |
|----|----------------------------|-------------|----------------------|------------|------------------------|-------------------------------------|------------|-----------|-----------------------|------------------------------------|------------------------------------------|----------------------|------------|------------------------|-------------------------------------|
| 30 | <b>Comparison Subjects</b> |             |                      |            |                        |                                     |            |           |                       | <b>Subjects with Schizophrenia</b> |                                          |                      |            |                        |                                     |
| 31 | <b>Pair</b>                | <b>Case</b> | <b>Sex/<br/>Race</b> | <b>Age</b> | <b>PMI<sup>d</sup></b> | <b>Storage<br/>Time<sup>e</sup></b> | <b>RIN</b> | <b>pH</b> | <b>Cause of Death</b> | <b>Case</b>                        | <b>DSM IV diagnosis</b>                  | <b>Sex/<br/>Race</b> | <b>Age</b> | <b>PMI<sup>d</sup></b> | <b>Storage<br/>Time<sup>e</sup></b> |
| 32 | 23 <sup>a,b</sup>          | 739         | M/W                  | 40         | 15.8                   | 139                                 | 8.4        | 6.9       | ASCVD                 | 933                                | Disorganized schizophrenia               | M/W                  | 44         | 8.3                    | 100                                 |
| 33 | 24 <sup>a</sup>            | 1047        | M/W                  | 43         | 13.8                   | 84                                  | 9.0        | 6.6       | ASCVD                 | 1209                               | Schizoaffective disorder                 | M/W                  | 35         | 9.1                    | 64                                  |
| 34 | 25                         | 1086        | M/W                  | 51         | 24.2                   | 78                                  | 8.1        | 6.8       | ASCVD                 | 10025                              | Disorganized schizophrenia; OAR          | M/B                  | 52         | 27.1                   | 57                                  |
| 35 | 26 <sup>a</sup>            | 1092        | F/B                  | 40         | 16.6                   | 77                                  | 8.0        | 6.8       | Mitral Valve Prolapse | 1178                               | Schizoaffective disorder                 | F/B                  | 37         | 18.9                   | 69                                  |
| 36 | 27                         | 10005       | M/W                  | 42         | 23.5                   | 65                                  | 7.4        | 6.7       | Trauma                | 1256                               | Undifferentiated schizophrenia           | M/W                  | 34         | 27.4                   | 57                                  |
| 37 | 28                         | 1336        | M/W                  | 65         | 18.4                   | 42                                  | 8.0        | 6.8       | Cardiac Tamponade     | 1173                               | Disorganized schizophrenia; ADR          | M/W                  | 62         | 22.9                   | 69                                  |
| 38 | 29 <sup>a</sup>            | 1122        | M/W                  | 55         | 15.4                   | 74                                  | 7.9        | 6.7       | Cardiac Tamponade     | 1105                               | Schizoaffective disorder                 | M/W                  | 53         | 7.9                    | 76                                  |
| 39 | 30 <sup>a</sup>            | 1284        | M/W                  | 55         | 6.4                    | 53                                  | 8.7        | 6.8       | ASCVD                 | 1188                               | Undifferentiated schizophrenia; AAR; OAR | M/W                  | 58         | 7.7                    | 67                                  |
| 40 | 31                         | 1191        | M/B                  | 59         | 19.4                   | 66                                  | 8.4        | 6.2       | ASCVD                 | 1263                               | Undifferentiated schizophrenia; ADR      | M/W                  | 62         | 22.7                   | 56                                  |
| 41 | 32                         | 970         | M/W                  | 42         | 25.9                   | 95                                  | 7.2        | 6.4       | ASCVD                 | 1222                               | Undifferentiated schizophrenia; AAC      | M/W                  | 32         | 30.8                   | 62                                  |
| 42 | 33                         | 10003       | M/W                  | 49         | 21.2                   | 66                                  | 8.4        | 6.5       | Trauma                | 1088                               | Undifferentiated schizophrenia; ADC; OAC | M/W                  | 49         | 21.5                   | 78                                  |
| 43 | 34                         | 1247        | F/W                  | 58         | 22.7                   | 58                                  | 8.4        | 6.4       | ASCVD                 | 1240                               | Undifferentiated schizophrenia; ADR      | F/B                  | 50         | 22.9                   | 59                                  |
| 44 | 35                         | 1324        | M/W                  | 43         | 22.3                   | 45                                  | 7.3        | 7         | Aortic Dissection     | 10020                              | Paranoid schizophrenia; AAC; OAC         | M/W                  | 38         | 28.8                   | 58                                  |
| 45 | 36 <sup>a</sup>            | 1099        | F/W                  | 24         | 9.1                    | 76                                  | 8.6        | 6.5       | Cardiomyopathy        | 10023                              | Disorganized schizophrenia               | F/B                  | 25         | 20.1                   | 57                                  |
| 46 | 37 <sup>a</sup>            | 1307        | M/B                  | 32         | 4.8                    | 48                                  | 7.6        | 6.7       | ASCVD                 | 10024                              | Paranoid schizophrenia                   | M/B                  | 37         | 6.0                    | 57                                  |
| 47 | 38 <sup>a</sup>            | 1391        | F/W                  | 51         | 7.8                    | 34.0                                | 7.1        | 6.6       | ASCVD                 | 1189                               | Schizoaffective disorder; AAR            | F/W                  | 47         | 14.4                   | 67                                  |

|    | A                                                                                                                                                                                                                                                                                                                                                                                                                                                                                                                                                            | B    | C    | D    | E    | F     | G   | H   | I     | J    | K                              | L   | M    | N    | O     |
|----|--------------------------------------------------------------------------------------------------------------------------------------------------------------------------------------------------------------------------------------------------------------------------------------------------------------------------------------------------------------------------------------------------------------------------------------------------------------------------------------------------------------------------------------------------------------|------|------|------|------|-------|-----|-----|-------|------|--------------------------------|-----|------|------|-------|
| 48 | 39                                                                                                                                                                                                                                                                                                                                                                                                                                                                                                                                                           | 1282 | F/W  | 39   | 24.5 | 53    | 7.5 | 6.8 | ASCVD | 1211 | Schizoaffective disorder       | F/W | 41   | 20.1 | 64    |
| 49 | 40 <sup>a</sup>                                                                                                                                                                                                                                                                                                                                                                                                                                                                                                                                              | 1159 | M/W  | 51   | 16.7 | 70    | 7.6 | 6.5 | ASCVD | 1296 | Undifferentiated schizophrenia | M/W | 48   | 7.8  | 50    |
| 50 | 41                                                                                                                                                                                                                                                                                                                                                                                                                                                                                                                                                           | 1326 | M/W  | 58   | 16.4 | 44    | 8.0 | 6.7 | ASCVD | 1314 | Undifferentiated schizophrenia | M/W | 50   | 11.0 | 47    |
| 51 | 42                                                                                                                                                                                                                                                                                                                                                                                                                                                                                                                                                           | 902  | M/W  | 60   | 23.6 | 109   | 7.7 | 6.7 | ASCVD | 1361 | Schizoaffective disorder; ODC  | M/W | 63   | 23.2 | 39    |
| 52 |                                                                                                                                                                                                                                                                                                                                                                                                                                                                                                                                                              |      | Mean | 48.5 | 17.8 | 104.2 | 8.3 | 6.8 |       |      |                                |     | 47.0 | 18.1 | 106.0 |
| 53 |                                                                                                                                                                                                                                                                                                                                                                                                                                                                                                                                                              |      | SD   | 13.3 | 5.9  | 43.9  | 0.6 | 0.2 |       |      |                                |     | 12.8 | 8.7  | 45.6  |
| 54 |                                                                                                                                                                                                                                                                                                                                                                                                                                                                                                                                                              |      |      |      |      |       |     |     |       |      |                                |     |      |      |       |
| 55 |                                                                                                                                                                                                                                                                                                                                                                                                                                                                                                                                                              |      |      |      |      |       |     |     |       |      |                                |     |      |      |       |
| 56 | <b>Footnotes</b>                                                                                                                                                                                                                                                                                                                                                                                                                                                                                                                                             |      |      |      |      |       |     |     |       |      |                                |     |      |      |       |
| 57 |                                                                                                                                                                                                                                                                                                                                                                                                                                                                                                                                                              |      |      |      |      |       |     |     |       |      |                                |     |      |      |       |
| 58 | a Pairs utilized in total protein study.                                                                                                                                                                                                                                                                                                                                                                                                                                                                                                                     |      |      |      |      |       |     |     |       |      |                                |     |      |      |       |
| 59 | b Pairs utilized in puncta study.                                                                                                                                                                                                                                                                                                                                                                                                                                                                                                                            |      |      |      |      |       |     |     |       |      |                                |     |      |      |       |
| 60 | c Subjects 630 and 1322 were used as the comparison subjects in pair 4 for qPCR and Western blotting studies, respectively.                                                                                                                                                                                                                                                                                                                                                                                                                                  |      |      |      |      |       |     |     |       |      |                                |     |      |      |       |
| 61 | d PMI, postmortem interval (hours).                                                                                                                                                                                                                                                                                                                                                                                                                                                                                                                          |      |      |      |      |       |     |     |       |      |                                |     |      |      |       |
| 62 | e Storage time (months) at -80°C.                                                                                                                                                                                                                                                                                                                                                                                                                                                                                                                            |      |      |      |      |       |     |     |       |      |                                |     |      |      |       |
| 63 | f First-degree relative with schizophrenia.                                                                                                                                                                                                                                                                                                                                                                                                                                                                                                                  |      |      |      |      |       |     |     |       |      |                                |     |      |      |       |
| 64 | Other abbreviations: ASCVD, arteriosclerotic cardiovascular disease; MCA, middle coronary artery; Benzo, benzodiazepines; VPA, valproic acid; ATOD, at time of death; ADC, alcohol dependence, current ATOD; ADR, alcohol dependence, in remission ATOD; AAC, alcohol abuse, current ATOD; AAR, alcohol abuse, in remission ATOD; ODC, other substance dependence, current ATOD; ODR, other substance dependence, in remission ATOD; OAC, other substance abuse, current ATOD; OAR, other substance abuse, in remission ATOD; ISP, Index of Social Position. |      |      |      |      |       |     |     |       |      |                                |     |      |      |       |
| 65 |                                                                                                                                                                                                                                                                                                                                                                                                                                                                                                                                                              |      |      |      |      |       |     |     |       |      |                                |     |      |      |       |
| 66 |                                                                                                                                                                                                                                                                                                                                                                                                                                                                                                                                                              |      |      |      |      |       |     |     |       |      |                                |     |      |      |       |
| 67 |                                                                                                                                                                                                                                                                                                                                                                                                                                                                                                                                                              |      |      |      |      |       |     |     |       |      |                                |     |      |      |       |
| 68 |                                                                                                                                                                                                                                                                                                                                                                                                                                                                                                                                                              |      |      |      |      |       |     |     |       |      |                                |     |      |      |       |
| 69 |                                                                                                                                                                                                                                                                                                                                                                                                                                                                                                                                                              |      |      |      |      |       |     |     |       |      |                                |     |      |      |       |
| 70 |                                                                                                                                                                                                                                                                                                                                                                                                                                                                                                                                                              |      |      |      |      |       |     |     |       |      |                                |     |      |      |       |
| 71 |                                                                                                                                                                                                                                                                                                                                                                                                                                                                                                                                                              |      |      |      |      |       |     |     |       |      |                                |     |      |      |       |
| 72 |                                                                                                                                                                                                                                                                                                                                                                                                                                                                                                                                                              |      |      |      |      |       |     |     |       |      |                                |     |      |      |       |
| 73 |                                                                                                                                                                                                                                                                                                                                                                                                                                                                                                                                                              |      |      |      |      |       |     |     |       |      |                                |     |      |      |       |

|    | P          | Q         | R                                 | S                       | T                    | U                         | V                          | W                               |
|----|------------|-----------|-----------------------------------|-------------------------|----------------------|---------------------------|----------------------------|---------------------------------|
| 1  |            |           |                                   |                         |                      |                           |                            |                                 |
| 2  |            |           |                                   |                         |                      |                           |                            |                                 |
| 3  |            |           |                                   |                         |                      |                           |                            |                                 |
| 4  |            |           |                                   |                         |                      |                           |                            |                                 |
| 5  |            |           |                                   |                         |                      |                           |                            |                                 |
| 6  | <b>RIN</b> | <b>pH</b> | <b>Cause of Death</b>             | <b>Cannabis History</b> | <b>Nicotine ATOD</b> | <b>Antipsychotic ATOD</b> | <b>Antidepressant ATOD</b> | <b>Benzodiazepine/ VPA ATOD</b> |
| 7  | 8.4        | 6.8       | Accidental Asphyxiation           | None                    | U                    | Y                         | N                          | N                               |
| 8  | 8.6        | 6.7       | Suicide by hanging                | None                    | U                    | N                         | N                          | N                               |
| 9  | 7.4        | 7.0       | Heat Stroke                       | None                    | U                    | Y                         | Y                          | Y                               |
| 10 | 8.0        | 6.8       | ASCVD                             | None                    | Y                    | Y                         | Y                          | Y                               |
| 11 |            |           |                                   |                         |                      |                           |                            |                                 |
| 12 | 7.9        | 7.2       | Accidental combined drug overdose | Use                     | U                    | Y                         | N                          | Y                               |
| 13 | 9.0        | 7.0       | Myocardial hypertrophy            | Use                     | Y                    | Y                         | N                          | Y                               |
| 14 | 7.6        | 7.3       | ASCVD                             | None                    | Y                    | Y                         | Y                          | N                               |
| 15 | 7.4        | 6.8       | Right MCA infarction              | None                    | U                    | N                         | N                          | N                               |
| 16 | 8.4        | 6.9       | Pulmonary embolism                | None                    | U                    | Y                         | Y                          | N                               |
| 17 | 9.2        | 6.9       | Intestinal hemorrhage             | None                    | Y                    | Y                         | Y                          | N                               |
| 18 | 8.4        | 6.7       | Suicide by gun shot               | Dependence              | N                    | Y                         | N                          | N                               |

|    | P   | Q   | R                                 | S                  | T | U | V | W |
|----|-----|-----|-----------------------------------|--------------------|---|---|---|---|
| 19 | 9.3 | 6.8 | Suicide by salicylate overdose    | Abuse in remission | Y | N | N | Y |
| 20 | 8.9 | 6.7 | Myocardial fibrosis               | Use                | Y | Y | Y | Y |
| 21 | 9.3 | 6.7 | Intracerebral hemorrhage          | None               | Y | Y | N | N |
| 22 | 8.1 | 7.1 | Suicide by combined drug overdose | None               | U | Y | Y | Y |
| 23 | 8.7 | 7.3 | Accidental asphyxiation           | None               | U | N | N | N |
| 24 | 9.2 | 7.3 | Suicide by gun shot               | None               | Y | Y | N | N |
| 25 | 9.2 | 6.7 | Upper GI bleeding                 | Use                | Y | Y | N | N |
| 26 | 7.7 | 6.7 | Peritonitis                       | None               | Y | Y | Y | N |
| 27 | 9.2 | 6.4 | Right ventricular dysplasia       | None               | Y | Y | N | Y |
| 28 | 7.0 | 6.8 | ASCVD                             | None               | Y | Y | N | N |
| 29 | 8.2 | 6.2 | ASCVD                             | Abuse              | Y | Y | N | Y |

|    | P          | Q         | R                                   | S                       | T                    | U                         | V                          | W                              |
|----|------------|-----------|-------------------------------------|-------------------------|----------------------|---------------------------|----------------------------|--------------------------------|
| 30 |            |           |                                     |                         |                      |                           |                            |                                |
| 31 | <b>RIN</b> | <b>pH</b> | <b>Cause of Death</b>               | <b>Cannabis History</b> | <b>Nicotine ATOD</b> | <b>Antipsychotic ATOD</b> | <b>Antidepressant ATOD</b> | <b>Benzodiazepine/VPA ATOD</b> |
| 32 | 8.1        | 5.9       | Myocarditis                         | None                    | N                    | Y                         | Y                          | Y                              |
| 33 | 8.7        | 6.5       | Suicide by diphenhydramine overdose | None                    | N                    | Y                         | N                          | N                              |
| 34 | 7.8        | 6.7       | ASCVD                               | Abuse in remission      | Y                    | N                         | N                          | N                              |
| 35 | 8.4        | 6.1       | Pulmonary embolism                  | None                    | Y                    | Y                         | N                          | Y                              |
| 36 | 7.9        | 6.4       | Suicide by hanging                  | None                    | N                    | Y                         | N                          | N                              |
| 37 | 7.7        | 6.4       | ASCVD                               | None                    | Y                    | Y                         | N                          | N                              |
| 38 | 8.9        | 6.2       | ASCVD                               | None                    | Y                    | Y                         | N                          | N                              |
| 39 | 8.4        | 6.2       | ASCVD                               | Abuse in remission      | Y                    | Y                         | N                          | N                              |
| 40 | 8.5        | 7.1       | Accidental asphyxiation             | Use                     | Y                    | Y                         | Y                          | N                              |
| 41 | 7.5        | 6.4       | Suicide by combined drug overdose   | Use                     | N                    | Y                         | Y                          | N                              |
| 42 | 8.1        | 6.5       | Accidental combined drug overdose   | Abuse                   | Y                    | Y                         | Y                          | N                              |
| 43 | 7.7        | 6.3       | ASCVD                               | None                    | Y                    | Y                         | N                          | N                              |
| 44 | 7.4        | 6.6       | Suicide by salicylate overdose      | None                    | Y                    | Y                         | Y                          | Y                              |
| 45 | 7.4        | 6.7       | Suicide by drowning                 | None                    | N                    | Y                         | N                          | Y                              |
| 46 | 7.5        | 6.1       | ASCVD                               | None                    | N                    | N                         | N                          | N                              |
| 47 | 8.3        | 6.4       | Suicide by combined drug overdose   | None                    | Y                    | Y                         | Y                          | Y                              |





|    | X                                              | Y                                           | Z                           | AA                      | AB                  | AC                          | AD                        |
|----|------------------------------------------------|---------------------------------------------|-----------------------------|-------------------------|---------------------|-----------------------------|---------------------------|
| 1  |                                                |                                             |                             |                         |                     |                             |                           |
| 2  |                                                |                                             |                             |                         |                     |                             |                           |
| 3  |                                                |                                             |                             |                         |                     |                             |                           |
| 4  |                                                |                                             |                             |                         |                     |                             |                           |
| 5  | <b>Subjects with Schizophrenia (continued)</b> |                                             |                             |                         |                     |                             |                           |
| 6  | Case                                           | DSM IV diagnosis                            | Family History <sup>f</sup> | Age at Onset of Illness | History of Marriage | Hollingshead Two Factor ISP | Living Independently ATOD |
| 7  | 533                                            | Chronic undifferentiated schizophrenia      | N                           | 25                      | N                   | 20                          | N                         |
| 8  | 537                                            | Schizoaffective disorder                    | N                           | 29                      | Y                   | 20                          | Y                         |
| 9  | 547                                            | Schizoaffective disorder                    | N                           | 18                      | N                   | 17                          | N                         |
| 10 | 566                                            | Chronic undifferentiated schizophrenia; AAR | N                           | 43                      | Y                   | 16                          | N                         |
| 11 |                                                |                                             |                             |                         |                     |                             |                           |
| 12 | 581                                            | Chronic paranoid schizophrenia; ADC; OAC    | Y                           | 16                      | Y                   | 19                          | Y                         |
| 13 | 587                                            | Chronic undifferentiated schizophrenia; AAR | N                           | 18                      | N                   | 17                          | N                         |
| 14 | 625                                            | Chronic disorganized schizophrenia; AAC     | Y                           | 35                      | Y                   | 34                          | N                         |
| 15 | 622                                            | Chronic undifferentiated schizophrenia      | N                           | 42                      | N                   | 27                          | N                         |
| 16 | 640                                            | Chronic paranoid schizophrenia              | N                           | 21                      | N                   | 63                          | N                         |
| 17 | 665                                            | Chronic paranoid schizophrenia; ADC         | Y                           | 27                      | N                   | 16                          | Y                         |
| 18 | 787                                            | Schizoaffective disorder; ODC               | N                           | 24                      | N                   | 30                          | N                         |

|    | X   | Y                                                | Z | AA | AB | AC | AD |
|----|-----|--------------------------------------------------|---|----|----|----|----|
| 19 | 829 | Schizoaffective disorder; ADC; OAR               | Y | 20 | N  | 22 | N  |
| 20 | 878 | Disorganized schizophrenia; ADC                  | N | 16 | N  | 57 | N  |
| 21 | 517 | Disorganized schizophrenia; ADC                  | N | 28 | Y  | 53 | N  |
| 22 | 539 | Schizoaffective disorder; ADR                    | N | 19 | Y  | 45 | Y  |
| 23 | 621 | Chronic undifferentiated schizophrenia           | Y | 28 | N  | 8  | N  |
| 24 | 656 | Schizoaffective disorder; ADC                    | Y | 17 | N  | 19 | Y  |
| 25 | 722 | Chronic undifferentiated schizophrenia; ODR; OAR | N | 26 | N  | 24 | N  |
| 26 | 781 | Schizoaffective disorder; ADR                    | N | 37 | Y  | 24 | N  |
| 27 | 802 | Schizoaffective disorder; ADC; ODR               | N | 20 | N  | 42 | Y  |
| 28 | 917 | Chronic undifferentiated schizophrenia           | Y | 24 | Y  | 19 | N  |
| 29 | 930 | Disorganized schizophrenia; ADR; OAR             | N | 19 | N  | 17 | N  |

|    | X                                              | Y                                        | Z                                 | AA                             | AB                         | AC                                 | AD                               |
|----|------------------------------------------------|------------------------------------------|-----------------------------------|--------------------------------|----------------------------|------------------------------------|----------------------------------|
| 30 | <b>Subjects with Schizophrenia (continued)</b> |                                          |                                   |                                |                            |                                    |                                  |
| 31 | <b>Case</b>                                    | <b>DSM IV diagnosis</b>                  | <b>Family History<sup>f</sup></b> | <b>Age at Onset of Illness</b> | <b>History of Marriage</b> | <b>Hollingshead Two Factor ISP</b> | <b>Living Independently ATOD</b> |
| 32 | 933                                            | Disorganized schizophrenia               | N                                 | 22                             | N                          | 27                                 | N                                |
| 33 | 1209                                           | Schizoaffective disorder                 | N                                 | 21                             | Y                          | 35                                 | Y                                |
| 34 | 10025                                          | Disorganized schizophrenia; OAR          | N                                 | 22                             | N                          | 27                                 | N                                |
| 35 | 1178                                           | Schizoaffective disorder                 | N                                 | 26                             | N                          | 40                                 | N                                |
| 36 | 1256                                           | Undifferentiated schizophrenia           | N                                 | 28                             | N                          | 36                                 | N                                |
| 37 | 1173                                           | Disorganized schizophrenia; ADR          | N                                 | 29                             | Y                          | 16                                 | Y                                |
| 38 | 1105                                           | Schizoaffective disorder                 | N                                 | 48                             | N                          | 24                                 | N                                |
| 39 | 1188                                           | Undifferentiated schizophrenia; AAR; OAR | Y                                 | 25                             | N                          | 45                                 | N                                |
| 40 | 1263                                           | Undifferentiated schizophrenia; ADR      | N                                 | 21                             | N                          | 11                                 | N                                |
| 41 | 1222                                           | Undifferentiated schizophrenia; AAC      | N                                 | 16                             | N                          | 14                                 | Y                                |
| 42 | 1088                                           | Undifferentiated schizophrenia; ADC; OAC | N                                 | 25                             | Y                          | 45                                 | N                                |
| 43 | 1240                                           | Undifferentiated schizophrenia; ADR      | N                                 | 25                             | N                          | 32                                 | N                                |
| 44 | 10020                                          | Paranoid schizophrenia; AAC; OAC         | N                                 | 18                             | N                          | 27                                 | N                                |
| 45 | 10023                                          | Disorganized schizophrenia               | Y                                 | 15                             | N                          | 17                                 | Y                                |
| 46 | 10024                                          | Paranoid schizophrenia                   | N                                 | 20                             | Y                          | 27                                 | N                                |
| 47 | 1189                                           | Schizoaffective disorder; AAR            | N                                 | 43                             | N                          | 66                                 | Y                                |

|    | X    | Y                              | Z      | AA | AB      | AC | AD      |
|----|------|--------------------------------|--------|----|---------|----|---------|
| 48 | 1211 | Schizoaffective disorder       | N      | 29 | Y       | 30 | N       |
| 49 | 1296 | Undifferentiated schizophrenia | N      | 13 | N       | 14 | N       |
| 50 | 1314 | Undifferentiated schizophrenia | N      | 17 | N       | 19 | N       |
| 51 | 1361 | Schizoaffective disorder; ODC  | N      | 16 | N       | 17 | N       |
| 52 |      |                                | 9Y/33N |    | 13Y/29N |    | 11Y/31N |
| 53 |      |                                |        |    |         |    |         |
| 54 |      |                                |        |    |         |    |         |
| 55 |      |                                |        |    |         |    |         |
| 56 |      |                                |        |    |         |    |         |
| 57 |      |                                |        |    |         |    |         |
| 58 |      |                                |        |    |         |    |         |
| 59 |      |                                |        |    |         |    |         |
| 60 |      |                                |        |    |         |    |         |
| 61 |      |                                |        |    |         |    |         |
| 62 |      |                                |        |    |         |    |         |
| 63 |      |                                |        |    |         |    |         |
| 64 |      |                                |        |    |         |    |         |
| 65 |      |                                |        |    |         |    |         |
| 66 |      |                                |        |    |         |    |         |
| 67 |      |                                |        |    |         |    |         |
| 68 |      |                                |        |    |         |    |         |
| 69 |      |                                |        |    |         |    |         |
| 70 |      |                                |        |    |         |    |         |
| 71 |      |                                |        |    |         |    |         |
| 72 |      |                                |        |    |         |    |         |
| 73 |      |                                |        |    |         |    |         |
