# Supplementary material for: Cortical Deficits of Glutamic Acid Decarboxylase 67 Expression in Schizophrenia: Clinical, Protein, and Cell Type-Specific Features
Source: Atypon-hosted journal article supplement (doi:10.1176/appi.ajp.2011.11010052), 2011-06-03
Supplement: ajp_168_09_921_05.pdf [file ajp_168_09_921_05.pdf]

Supplemental table for Curley et al., Cortical Deficits of Glutamic Acid Decarboxylase 67 Expression in Schizophrenia: Clinical, Protein, and Cell Type-Specific Features, American Journal of Psychiatry (doi: 10.1176/appi.ajp.2011.11010052)

**TABLE S2. Design of the Four Primer Sets Utilized in qPCR**

| Gene                                             | Accession # | Amplicon Size (bp <sup>a</sup> ) | Position  | Forward Primer (F)<br>Reverse Primer (R)              |
|--------------------------------------------------|-------------|----------------------------------|-----------|-------------------------------------------------------|
| Beta actin                                       | NM_001101   | 101                              | 1146-1246 | (F) GATGTGGATCAGCAAGCA<br>(R) AGAAAGGGTGTAACGCAACTA   |
| Cyclophilin                                      | NM_021130   | 126                              | 159-284   | (F) GCAGACAAGGTCCCAAAG<br>(R) GAAGTCACCACCCTGACAAC    |
| Glyceraldehyde-3-phosphate dehydrogenase (GAPDH) | NM_002046   | 87                               | 556-642   | (F) TGCACCACCAACTGCTTAGC<br>(R) GGCATGGACTGTGGTCATGAG |
| Glutamate decarboxylase 67 kDa (GAD67)           | NM_000817   | 86                               | 2495-2580 | (F) GTTCCCGCTCCAAGAGAAT<br>(R) TGGAGTTGTTGGACAAGCTG   |

<sup>a</sup> bp=base pairs.
